# Supplementary material for: Secondary organic aerosol formed by Euro 5 gasoline vehicle emissions: chemical composition and gas-to-particle phase partitioning
Source: Copernicus journal article supplement (doi:10.5194/acp-24-2705-2024), 2024-02-29
Supplement: Supplementary file 1 [file acp-24-2705-2024-supplement.pdf]

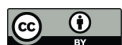

*Supplement of*

## **Secondary organic aerosol formed by Euro 5 gasoline vehicle emissions: chemical composition and gas-to-particle phase partitioning**

**Evangelia Kostenidou et al.**

*Correspondence to:* Evangelia Kostenidou (ekosteni@env.duth.gr) and Barbara D'Anna (barbara.danna@univ-amu.fr)

The copyright of individual parts of the supplement might differ from the article licence.

1 **Quantification of the PTR-ToF-MS signal**

2 Ionization of organic compounds (except some small hydrocarbons) by PTR-MS occurs  
3 with a collisional rate, which can be accurately predicted by ion–molecule collision  
4 theories (Ellis et al. 2013). The instrumental response factors for pure hydrocarbons  
5 were estimated using the Langevin–Gioumoussis–Stevenson theory (Langevin, 1903;  
6 Gioumoussis and Stevenson 1958). The instrumental sensitivities of heteroatom-  
7 containing hydrocarbons were calculated based on the Su and Chesnavich, (1982) rate  
8 theory. Thus the instrumental response factor can be estimated using the weight, the  
9 isotropic molecular polarizability, and the dipole moment of an analyte molecule. For  
10 the molecular weight we used the observed  $m/z - 1$  (accounting for the added proton)  
11 assuming that the molecule does not fragment upon protonation. Isotropic molecular  
12 polarizabilities were determined from the analyte ions’ elemental composition using the  
13 parametrization proposed by Bosque and Sales, (2002). For the dipole moment a  
14 constant value of 2.75 D was used for all heteroatom-containing analyte ions. This value  
15 corresponds to an average value of typical dipole moments of oxygenated hydrocarbons  
16 (1–4.5 D), resulting in a a maximum quantification uncertainty of  $\pm 40\%$ . For example  
17 methylglyoxal, which has a low dipole moment ( $\mu\text{D} = 0.992 \text{ D}$ ) has an uncertainty of  
18  $\pm 30\%$ . Signals with unidentified elemental composition were quantified using a proton  
19 reaction rate constant of  $2 \times 10^{-9} \text{ cm}^3 \text{ s}^{-1}$ . The total SOA mass concentration was  
20 calculated by adding the mass concentrations of all detected  $m/z$  peaks. The CHARON  
21 enrichment factor was 8 for particles of 150 nm, 20 for particles of 200 nm and 25 for  
22 particles larger than 250 nm. Enrichment factors were determined using monodispersed  
23 ammonium nitrate particles as proposed by Eichler et al. (2015).

24  
25  
26  
27  
28  
29  
30  
31  
32  
33  
34  
35

36 **Table S1:** Number of the total m/z's detected, number of the detected m/z's with contribution higher than 0.14% to the total concentration (in  
 37 ppb) and the corresponding fraction explained by these m/z's for fresh VOC, secondary VOC and SOA.

|                                                                                 | <b>Exp #1</b> | <b>Exp #2</b> | <b>Exp #3</b> | <b>Exp #4</b> | <b>Exp #5</b> |
|---------------------------------------------------------------------------------|---------------|---------------|---------------|---------------|---------------|
| <b>Fresh VOC</b>                                                                |               |               |               |               |               |
| Number of total detected m/z's                                                  | 61            | 59            | 59            | 67            | 103           |
| Number of detected m/z's with contribution<br>>0.14% to the total concentration | 49            | 47            | 48            | 53            | 75            |
| Fraction explained by the m/z's with contribution<br>>0.14%                     | 0.99          | 0.99          | 0.99          | 0.98          | 0.96          |
| <b>SVOC</b>                                                                     |               |               |               |               |               |
| Number of total detected m/z's                                                  | 163           | 95            | 92            | 112           | 108           |
| Number of detected m/z's with contribution<br>>0.14% to the total concentration | 95            | 63            | 62            | 72            | 69            |
| Fraction explained by the m/z's with contribution<br>>0.14%                     | 0.93          | 0.97          | 0.97          | 0.96          | 0.96          |
| <b>SOA</b>                                                                      |               |               |               |               |               |
| Number of total detected m/z's                                                  | 237           | 169           | 190           | 184           | 253           |
| Number of detected m/z's with contribution<br>>0.14% to the total concentration | 156           | 110           | 124           | 113           | 179           |
| Fraction explained by the m/z's with contribution<br>>0.14%                     | 0.92          | 0.94          | 0.93          | 0.93          | 0.95          |

38

39

40 **Table S2:** List of the measured accurate  $m/z$ 's and elemental composition  $C_xH_yN_zO_w^+$   
 41 of the most significant detected ions with concentration higher than 0.14% of the total  
 42 detected ion concentration of the fresh emissions in the chamber (before any dilution  
 43 in the chamber) during cold urban (experiments #1, 2 and 3), hot urban (experiment  
 44 #4) and motorway (experiment # 5) Artemis cycles. These ions explained 85-99% of  
 45 the measured concentration.

| m/z    | Molecular type                                                                                      | Concentration (ppb) |        |        |        |        |
|--------|-----------------------------------------------------------------------------------------------------|---------------------|--------|--------|--------|--------|
|        |                                                                                                     | Exp #1              | Exp #2 | Exp #3 | Exp #4 | Exp #5 |
| 28.03  | (C <sub>2</sub> H <sub>3</sub> )H <sup>+</sup>                                                      | 22.8                | 28.7   | 30.3   | 0.9    | 1.0    |
| 29.04  | (C <sub>2</sub> H <sub>4</sub> )H <sup>+</sup>                                                      | 8.4                 | 7.4    | 11.5   | -      | -      |
| 31.02  | (CH <sub>2</sub> O)H <sup>+</sup>                                                                   | 18.2                | 25.1   | 15.1   | -      | -      |
| 33.03  | (CH <sub>3</sub> OH)H <sup>+</sup>                                                                  | 28.5                | 16.4   | 19.2   | 0.6    | 1.0    |
| 41.04  | (C <sub>3</sub> H <sub>4</sub> )H <sup>+</sup>                                                      | 41.2                | 76.5   | 57.7   | 1.1    | 1.4    |
| 42.03  | (C <sub>2</sub> H <sub>3</sub> N)H <sup>+</sup>                                                     | -                   | -      | 8.3    | 1.3    | 1.4    |
| 42.05  | (C <sub>3</sub> H <sub>5</sub> )H <sup>+</sup>                                                      | 15.0                | 23.1   | 20.5   | 1.1    | 1.1    |
| 43.05  | (C <sub>3</sub> H <sub>6</sub> )H <sup>+</sup>                                                      | 188.9               | 299.4  | 274.7  | 6.2    | 4.5    |
| 44.06  | ([13C]C <sub>2</sub> H <sub>6</sub> )H <sup>+</sup>                                                 | 6.2                 | 9.8    | 9.2    | 0.3    | 0.4    |
| 45.03  | (C <sub>2</sub> H <sub>4</sub> O)H <sup>+</sup>                                                     | 53.1                | 69.1   | 71.1   | 0.9    | 2.1    |
| 47.05  | (C <sub>2</sub> H <sub>6</sub> O)H <sup>+</sup>                                                     | 97.8                | 100.2  | 106.5  | 0.7    | 1.2    |
| 56.06  | (C <sub>4</sub> H <sub>7</sub> )H <sup>+</sup>                                                      | 20.1                | 26.7   | 25.0   | 1.5    | 0.8    |
| 57.03  | (C <sub>3</sub> H <sub>4</sub> O)H <sup>+</sup>                                                     | 9.3                 | 10.9   | 9.8    | 0.2    | 0.3    |
| 57.07  | (C <sub>4</sub> H <sub>8</sub> )H <sup>+</sup>                                                      | 362.8               | 493.6  | 457.1  | 14.6   | 8.0    |
| 58.07  | ([13C]C <sub>3</sub> H <sub>8</sub> )H <sup>+</sup>                                                 | 16.3                | 21.9   | 20.2   | 0.6    | 0.4    |
| 59.05  | (C <sub>3</sub> H <sub>6</sub> O)H <sup>+</sup>                                                     | 13.9                | 14.7   | 26.0   | 0.9    | 1.7    |
| 67.05  | (C <sub>5</sub> H <sub>6</sub> )H <sup>+</sup>                                                      | 10.7                | 16.4   | 13.2   | -      | -      |
| 69.07  | (C <sub>5</sub> H <sub>8</sub> )H <sup>+</sup>                                                      | 24.1                | 39.2   | 31.5   | 0.3    | 0.8    |
| 70.07  | ([13C]C <sub>4</sub> H <sub>8</sub> )H <sup>+</sup> +(C <sub>5</sub> H <sub>9</sub> )H <sup>+</sup> | 11.7                | 14.5   | 13.9   | 0.9    | 0.3    |
| 71.05  | (C <sub>4</sub> H <sub>6</sub> O)H <sup>+</sup>                                                     | 6.9                 | 6.5    | 6.4    | -      | 0.3    |
| 71.09  | (C <sub>5</sub> H <sub>10</sub> )H <sup>+</sup>                                                     | 134.8               | 192.1  | 166.6  | 5.1    | 3.0    |
| 72.09  | ([13C]C <sub>4</sub> H <sub>10</sub> )H <sup>+</sup>                                                | 7.9                 | 10.6   | 9.2    | 0.3    | 0.2    |
| 78.05  | (C <sub>6</sub> H <sub>5</sub> )H <sup>+</sup>                                                      | 10.8                | 13.9   | 15.6   | 1.6    | 0.4    |
| 79.05  | (C <sub>6</sub> H <sub>6</sub> )H <sup>+</sup>                                                      | 155.6               | 212.4  | 245.8  | 15.7   | 5.8    |
| 80.06  | ([13C]C <sub>5</sub> H <sub>6</sub> )H <sup>+</sup>                                                 | 11.9                | 15.1   | 17.0   | 1.1    | 0.5    |
| 81.07  | (C <sub>6</sub> H <sub>8</sub> )H <sup>+</sup>                                                      | 5.2                 | 8.0    | 7.6    | -      | 0.2    |
| 83.09  | (C <sub>6</sub> H <sub>10</sub> )H <sup>+</sup>                                                     | 14.8                | 19.4   | 17.0   | 0.3    | 0.4    |
| 85.10  | (C <sub>6</sub> H <sub>12</sub> )H <sup>+</sup>                                                     | 71.6                | 87.8   | 81.9   | 2.3    | 1.7    |
| 91.05  | (C <sub>7</sub> H <sub>6</sub> )H <sup>+</sup>                                                      | 13.1                | 14.6   | 14.9   | 0.5    | 0.4    |
| 92.06  | ([13C]C <sub>6</sub> H <sub>6</sub> )H <sup>+</sup> +(C <sub>7</sub> H <sub>7</sub> )H <sup>+</sup> | 16.6                | 22.3   | 21.4   | 1.2    | 0.2    |
| 93.07  | (C <sub>7</sub> H <sub>8</sub> )H <sup>+</sup>                                                      | 306.7               | 381.6  | 375.1  | 13.8   | 3.8    |
| 94.07  | ([13C]C <sub>6</sub> H <sub>8</sub> )H <sup>+</sup>                                                 | 25.2                | 29.3   | 28.5   | 1.1    | 0.4    |
| 97.10  | (C <sub>7</sub> H <sub>12</sub> )H <sup>+</sup>                                                     | 5.2                 | 6.1    | 6.0    | -      | 0.2    |
| 105.07 | (C <sub>8</sub> H <sub>8</sub> )H <sup>+</sup>                                                      | 34.7                | 56.3   | 44.6   | 0.8    | 1.5    |
| 106.07 | ([13C]C <sub>7</sub> H <sub>8</sub> )H <sup>+</sup> +(C <sub>8</sub> H <sub>9</sub> )H <sup>+</sup> | 34.2                | 42.7   | 41.1   | 1.3    | 0.4    |
| 107.09 | (C <sub>8</sub> H <sub>10</sub> )H <sup>+</sup>                                                     | 824.7               | 963.7  | 1029.0 | 19.2   | 8.8    |
| 108.09 | ([13C]C <sub>7</sub> H <sub>10</sub> )H <sup>+</sup>                                                | 77.7                | 84.0   | 86.3   | 1.7    | 0.8    |

|        |                                                                                                                    |       |       |       |     |     |
|--------|--------------------------------------------------------------------------------------------------------------------|-------|-------|-------|-----|-----|
| 111.12 | (C <sub>8</sub> H <sub>14</sub> )H <sup>+</sup>                                                                    | 5.4   | -     | 6.2   | 0.2 | 0.3 |
| 117.07 | (C <sub>9</sub> H <sub>8</sub> )H <sup>+</sup>                                                                     | 5.2   | 10.8  | 8.9   | 0.2 | 0.4 |
| 119.09 | (C <sub>9</sub> H <sub>10</sub> )H <sup>+</sup>                                                                    | 34.1  | 47.8  | 36.5  | 0.7 | 2.1 |
| 120.09 | ([ <sup>13</sup> C]C <sub>8</sub> H <sub>10</sub> )H <sup>+</sup> +(C <sub>9</sub> H <sub>11</sub> )H <sup>+</sup> | 21.9  | 26.0  | 24.2  | 0.7 | 0.6 |
| 121.10 | (C <sub>9</sub> H <sub>12</sub> )H <sup>+</sup>                                                                    | 435.9 | 537.4 | 552.5 | 9.7 | 9.9 |
| 122.11 | ([ <sup>13</sup> C]C <sub>8</sub> H <sub>12</sub> )H <sup>+</sup>                                                  | 46.9  | 52.8  | 53.0  | 1.0 | 1.0 |
| 129.07 | (C <sub>10</sub> H <sub>8</sub> )H <sup>+</sup>                                                                    | -     | 10.1  | 6.6   | 1.4 | 2.0 |
| 133.10 | (C <sub>10</sub> H <sub>12</sub> )H <sup>+</sup>                                                                   | 4.8   | 9.9   | 6.7   | 0.4 | 0.8 |
| 135.12 | (C <sub>10</sub> H <sub>14</sub> )H <sup>+</sup>                                                                   | 38.4  | 59.1  | 50.1  | 2.3 | 3.0 |
| 136.12 | ([ <sup>13</sup> C]C <sub>9</sub> H <sub>14</sub> )H <sup>+</sup>                                                  | -     | 6.2   | -     | 0.2 | 0.3 |

**Fraction of  
the above  
compounds  
to the total  
fresh VOC**

**0.95      0.98      0.99      0.90      0.85**

46

47

48

49

50

51

52

53

54

55

56

57

58

59

60

61

62

63

64

65

66

67 **Table S3:** List of the measured accurate  $m/z$ 's and elemental composition  $C_xH_yN_zO_w^+$   
68 of the most significant detected ions with concentration higher than 0.14% of the total  
69 detected ion concentration of the secondary gas phase products produced from cold  
70 urban (experiments #1, 2 and 3), hot urban (experiment #4) and motorway (experiment  
71 # 5) Artemis cycles emissions. These ions represented 89-97% of the measured  
72 concentration.

| m/z    | Molecular type                                                     | Concentration (ppb) |        |        |        |        |
|--------|--------------------------------------------------------------------|---------------------|--------|--------|--------|--------|
|        |                                                                    | Exp #1              | Exp #2 | Exp #3 | Exp #4 | Exp #5 |
| 31.02  | (CH <sub>2</sub> O)H <sup>+</sup>                                  | 62.0                | 17.9   | 16.9   | 2.2    | 1.1    |
| 33.03  | (CH <sub>3</sub> OH)H <sup>+</sup>                                 | 5.9                 | 1.7    | 8.7    | 1.8    | 1.8    |
| 43.02  | (C <sub>2</sub> H <sub>2</sub> O)H <sup>+</sup>                    | 85.1                | 16.4   | 54.9   | 11.1   | 5.4    |
| 45.03  | (C <sub>2</sub> H <sub>4</sub> O)H <sup>+</sup>                    | 203.0               | 72.7   | 78.9   | 13.1   | 5.0    |
| 46.03  | <b>(CH<sub>3</sub>NO)H<sup>+</sup></b>                             | 12.4                | -      | 6.2    | 2.5    | 1.0    |
| 47.01  | (CH <sub>2</sub> O <sub>2</sub> )H <sup>+</sup>                    | 17.7                | 2.3    | 60.5   | 4.9    | -      |
| 57.03  | (C <sub>3</sub> H <sub>4</sub> O)H <sup>+</sup>                    | 19.8                | 6.7    | 7.6    | 1.3    | 0.8    |
| 59.01  | (C <sub>2</sub> H <sub>2</sub> O <sub>2</sub> )H <sup>+</sup>      | 3.5                 | -      | -      | -      | 0.1    |
| 59.05  | (C <sub>3</sub> H <sub>6</sub> O)H <sup>+</sup>                    | 185.3               | 66.6   | 74.3   | 18.4   | 7.7    |
| 60.04  | <b>(C<sub>2</sub>H<sub>5</sub>NO)H<sup>+</sup></b>                 | 3.9                 | -      | 2.5    | 1.1    | -      |
| 61.03  | (C <sub>2</sub> H <sub>4</sub> O <sub>2</sub> )H <sup>+</sup>      | 100.3               | 15.1   | 88.2   | 21.0   | 10.2   |
| 71.01  | (C <sub>3</sub> H <sub>2</sub> O <sub>2</sub> )H <sup>+</sup>      | 2.8                 | 0.2    | 0.4    | 0.2    | 0.1    |
| 71.05  | (C <sub>4</sub> H <sub>6</sub> O)H <sup>+</sup>                    | 12.7                | 4.1    | 2.5    | 0.8    | 0.6    |
| 73.03  | (C <sub>3</sub> H <sub>4</sub> O <sub>2</sub> )H <sup>+</sup>      | 94.3                | 28.1   | 36.0   | 4.2    | 1.7    |
| 73.06  | (C <sub>4</sub> H <sub>8</sub> O)H <sup>+</sup>                    | 42.1                | 13.4   | 13.7   | 3.1    | 1.1    |
| 74.03  | ([13C]C <sub>2</sub> H <sub>4</sub> O <sub>2</sub> )H <sup>+</sup> | 2.7                 | 0.5    | 1.2    | 0.5    | 0.4    |
| 75.04  | (C <sub>3</sub> H <sub>6</sub> O <sub>2</sub> )H <sup>+</sup>      | 18.5                | 3.7    | 12.8   | 2.0    | 1.5    |
| 77.02  | (C <sub>2</sub> H <sub>4</sub> O <sub>3</sub> )H <sup>+</sup>      | 10.0                | 1.0    | 21.5   | 1.2    | 0.5    |
| 83.01  | (C <sub>4</sub> H <sub>2</sub> O <sub>2</sub> )H <sup>+</sup>      | 7.1                 | 0.7    | 2.8    | 0.8    | 0.6    |
| 83.05  | (C <sub>5</sub> H <sub>6</sub> O)H <sup>+</sup>                    | 2.7                 | 0.6    | -      | -      | -      |
| 85.03  | (C <sub>4</sub> H <sub>4</sub> O <sub>2</sub> )H <sup>+</sup>      | 8.5                 | 1.2    | 1.4    | 0.4    | 0.2    |
| 85.06  | (C <sub>5</sub> H <sub>8</sub> O)H <sup>+</sup>                    | 6.5                 | 1.8    | 1.9    | 0.6    | 0.3    |
| 87.04  | (C <sub>4</sub> H <sub>6</sub> O <sub>2</sub> )H <sup>+</sup>      | 31.2                | 8.9    | 13.6   | 2.7    | 1.0    |
| 87.08  | (C <sub>5</sub> H <sub>10</sub> O)H <sup>+</sup>                   | 16.3                | 5.1    | 5.9    | 1.3    | 0.4    |
| 89.02  | (C <sub>3</sub> H <sub>4</sub> O <sub>3</sub> )H <sup>+</sup>      | 6.5                 | 0.6    | 2.1    | 0.7    | 0.4    |
| 89.06  | (C <sub>4</sub> H <sub>8</sub> O <sub>2</sub> )H <sup>+</sup>      | 4.4                 | 0.7    | 3.1    | 1.1    | 0.7    |
| 90.02  | <b>(C<sub>2</sub>H<sub>3</sub>NO<sub>3</sub>)H<sup>+</sup></b>     | 2.9                 | -      | 1.4    | 0.4    | 0.2    |
| 95.05  | (C <sub>6</sub> H <sub>6</sub> O)H <sup>+</sup>                    | 2.3                 | 0.6    | -      | 0.2    | -      |
| 97.03  | (C <sub>5</sub> H <sub>4</sub> O <sub>2</sub> )H <sup>+</sup>      | 8.5                 | 0.7    | 2.0    | 0.3    | 0.1    |
| 98.02  | <b>(C<sub>4</sub>H<sub>3</sub>NO<sub>2</sub>)H<sup>+</sup></b>     | 2.2                 | -      | -      | 0.2    | 0.1    |
| 99.01  | (C <sub>4</sub> H <sub>2</sub> O <sub>3</sub> )H <sup>+</sup>      | 12.9                | 1.9    | 6.5    | 0.8    | 0.9    |
| 99.04  | (C <sub>5</sub> H <sub>6</sub> O <sub>2</sub> )H <sup>+</sup>      | 23.9                | 4.9    | 3.6    | 0.7    | 0.3    |
| 99.08  | (C <sub>6</sub> H <sub>10</sub> O)H <sup>+</sup>                   | 5.6                 | 1.7    | 1.7    | 0.6    | 0.2    |
| 100.04 | <b>(C<sub>4</sub>H<sub>5</sub>NO<sub>2</sub>)H<sup>+</sup></b>     | 3.9                 | 0.5    | -      | 0.3    | 0.1    |
| 101.02 | (C <sub>4</sub> H <sub>4</sub> O <sub>3</sub> )H <sup>+</sup>      | 7.1                 | 0.7    | 2.8    | 0.8    | 0.6    |
| 101.06 | (C <sub>5</sub> H <sub>8</sub> O <sub>2</sub> )H <sup>+</sup>      | 8.6                 | 2.1    | 3.3    | 0.8    | 0.4    |
| 101.10 | (C <sub>6</sub> H <sub>12</sub> O)H <sup>+</sup>                   | 5.0                 | 1.4    | 1.6    | 0.3    | 0.1    |

|        |                                                                |      |     |     |     |     |
|--------|----------------------------------------------------------------|------|-----|-----|-----|-----|
| 103.04 | (C <sub>4</sub> H <sub>6</sub> O <sub>3</sub> )H <sup>+</sup>  | 6.0  | -   | 1.3 | 0.3 | 0.1 |
| 107.05 | (C <sub>7</sub> H <sub>6</sub> O)H <sup>+</sup>                | 7.4  | 0.6 | 2.0 | -   | -   |
| 109.03 | (C <sub>6</sub> H <sub>4</sub> O <sub>2</sub> )H <sup>+</sup>  | -    | -   | 1.8 | 0.3 | 0.4 |
| 109.07 | (C <sub>7</sub> H <sub>8</sub> O)H <sup>+</sup>                | 3.1  | 1.3 | -   | -   | -   |
| 111.04 | (C <sub>6</sub> H <sub>6</sub> O <sub>2</sub> )H <sup>+</sup>  | 11.4 | 1.0 | 2.0 | 0.2 | -   |
| 112.04 | <b>(C<sub>5</sub>H<sub>5</sub>NO<sub>2</sub>)H<sup>+</sup></b> | 4.7  | 0.6 | -   | 0.2 | -   |
| 113.02 | (C <sub>5</sub> H <sub>4</sub> O <sub>3</sub> )H <sup>+</sup>  | 25.2 | 3.4 | 8.8 | 1.0 | 0.7 |
| 113.06 | (C <sub>6</sub> H <sub>8</sub> O <sub>2</sub> )H <sup>+</sup>  | 29.0 | 8.5 | 3.6 | 0.7 | 0.3 |
| 113.10 | (C <sub>7</sub> H <sub>12</sub> O)H <sup>+</sup>               | 5.1  | 1.3 | 1.2 | 0.6 | 0.1 |
| 115.04 | (C <sub>5</sub> H <sub>6</sub> O <sub>3</sub> )H <sup>+</sup>  | 11.6 | 1.2 | 3.6 | 0.6 | 0.4 |
| 115.08 | (C <sub>6</sub> H <sub>10</sub> O <sub>2</sub> )H <sup>+</sup> | 4.1  | 1.2 | 2.1 | 0.6 | 0.2 |
| 117.02 | (C <sub>4</sub> H <sub>4</sub> O <sub>4</sub> )H <sup>+</sup>  | 2.3  | 0.2 | 0.5 | 0.1 | 0.1 |
| 121.07 | (C <sub>8</sub> H <sub>8</sub> O)H <sup>+</sup>                | 10.9 | 2.7 | 3.8 | 0.2 | -   |
| 123.04 | (C <sub>7</sub> H <sub>6</sub> O <sub>2</sub> )H <sup>+</sup>  | 3.1  | 0.5 | 1.6 | 0.2 | 0.3 |
| 125.02 | (C <sub>6</sub> H <sub>4</sub> O <sub>3</sub> )H <sup>+</sup>  | 2.3  | -   | 1.0 | 0.2 | 0.2 |
| 125.06 | (C <sub>7</sub> H <sub>8</sub> O <sub>2</sub> )H <sup>+</sup>  | 5.4  | 0.5 | 1.0 | -   | -   |
| 127.04 | (C <sub>6</sub> H <sub>6</sub> O <sub>3</sub> )H <sup>+</sup>  | 10.3 | 1.2 | 3.1 | 0.4 | 0.3 |
| 127.08 | (C <sub>7</sub> H <sub>10</sub> O <sub>2</sub> )H <sup>+</sup> | 5.6  | 1.5 | -   | -   | 0.1 |
| 127.11 | (C <sub>8</sub> H <sub>14</sub> O)H <sup>+</sup>               | 5.5  | 1.5 | 1.3 | 0.7 | -   |
| 129.06 | (C <sub>6</sub> H <sub>8</sub> O <sub>3</sub> )H <sup>+</sup>  | 7.6  | 0.8 | 2.4 | -   | 0.1 |
| 129.09 | (C <sub>7</sub> H <sub>12</sub> O <sub>2</sub> )H <sup>+</sup> | -    | 0.6 | 1.1 | 0.3 | 0.1 |
| 129.13 | (C <sub>8</sub> H <sub>16</sub> O)H <sup>+</sup>               | -    | -   | 1.2 | 0.2 | 0.1 |
| 135.08 | (C <sub>9</sub> H <sub>10</sub> O)H <sup>+</sup>               | 5.6  | 1.6 | 1.7 | -   | -   |
| 137.06 | (C <sub>8</sub> H <sub>8</sub> O <sub>2</sub> )H <sup>+</sup>  | 4.6  | 0.6 | 1.4 | 0.2 | 0.1 |
| 138.06 | <b>(C<sub>7</sub>H<sub>7</sub>NO<sub>2</sub>)H<sup>+</sup></b> | 3.8  | 0.6 | -   | -   | -   |
| 139.04 | (C <sub>7</sub> H <sub>6</sub> O <sub>3</sub> )H <sup>+</sup>  | 4.8  | 0.6 | 1.1 | 0.3 | 0.1 |
| 140.03 | <b>(C<sub>6</sub>H<sub>5</sub>NO<sub>3</sub>)H<sup>+</sup></b> | 3.8  | 0.5 | -   | 0.3 | 0.1 |
| 141.06 | (C <sub>7</sub> H <sub>8</sub> O <sub>3</sub> )H <sup>+</sup>  | 6.3  | 0.6 | 1.7 | 0.3 | 0.1 |
| 141.13 | (C <sub>9</sub> H <sub>16</sub> O)H <sup>+</sup>               | 2.5  | 0.8 | -   | 0.2 | -   |
| 143.03 | (C <sub>6</sub> H <sub>6</sub> O <sub>4</sub> )H <sup>+</sup>  | 3.2  | 0.2 | 0.6 | 0.2 | 0.1 |
| 149.02 | (C <sub>8</sub> H <sub>4</sub> O <sub>3</sub> )H <sup>+</sup>  | 2.3  | 0.5 | 1.2 | 0.3 | 0.3 |
| 152.07 | <b>(C<sub>8</sub>H<sub>9</sub>NO<sub>2</sub>)H<sup>+</sup></b> | 3.9  | 0.7 | 0.3 | 0.1 | -   |
| 154.05 | <b>(C<sub>7</sub>H<sub>7</sub>NO<sub>3</sub>)H<sup>+</sup></b> | 4.2  | -   | 1.2 | 0.3 | 0.1 |
| 168.07 | <b>(C<sub>8</sub>H<sub>9</sub>NO<sub>3</sub>)H<sup>+</sup></b> | 6.4  | 0.6 | 1.8 | 0.2 | -   |
| 171.03 | (C <sub>7</sub> H <sub>6</sub> O <sub>5</sub> )H <sup>+</sup>  | 1.4  | 0.1 | 0.1 | -   | -   |
| 173.04 | (C <sub>7</sub> H <sub>8</sub> O <sub>5</sub> )H <sup>+</sup>  | 3.8  | 0.1 | 0.3 | -   | -   |

**Fraction of  
the above  
compounds  
to the total  
secondary  
VOC**

**0.89      0.96      0.97      0.97      0.96**

73

74

75

76

77 **Table S4:** Supplementary information about SOA composition for the 5 experiments.

| Number of experiments                                       | Exp #1     | Exp #2     | Exp #3     | Exp #4    | Exp #5   |
|-------------------------------------------------------------|------------|------------|------------|-----------|----------|
| Type of cycle                                               | Cold Urban | Cold Urban | Cold Urban | Hot Urban | Motorway |
| <b>Based on CHARON/PTR-ToF-MS</b>                           |            |            |            |           |          |
| Fraction (of ppb) to m/z 200 into SOA                       | 0.98       | 0.99       | 0.99       | 0.99      | 0.99     |
| Fraction of ON into SOA                                     | 0.07       | 0.06       | 0.07       | 0.07      | 0.07     |
| <b>Based on HR-ToF-AMS</b>                                  |            |            |            |           |          |
| Fraction of organonitrates into total nitrate               | 0.15       | 0.20       | 0.20       | 0.12      | 0.19     |
| Fraction of organoammoniums into total ammonium             | NA         | 0.001      | NA         | NA        | 0.13     |
| Ratio cations/anions (inorganic phase)                      | 0.75       | 1.01       | 0.99       | 0.86      | 1.15     |
| Possible HNO <sub>3</sub> (µg m <sup>-3</sup> )             | 23.29      | NA         | 0.09       | 16.21     | NA       |
| Fraction of ammonium and nitrate in total secondary aerosol | 0.74       | 0.79       | 0.91       | 0.93      | 0.79     |

78

79

80



81 **Table S5:** List of the measured accurate  $m/z$ 's and elemental composition  $C_xH_yN_zO_w^+$   
82 of the most significant detected ions with concentration higher than 0.14% % of the  
83 total SOA concentration produced during cold urban (experiment #1, 2 and 3), hot  
84 urban (experiment #4) and motorway (experiment # 5) Artemis cycles. Concentrations  
85 are in ppb (before conversion to  $\mu\text{g m}^{-3}$  and normalization to the AMS organic mass  
86 concentration). These ions explained 79-92% of the measured concentration.

| $m/z$ | Molecular formula                                                                                          | Concentration (ppb) |        |        |        |        |
|-------|------------------------------------------------------------------------------------------------------------|---------------------|--------|--------|--------|--------|
|       |                                                                                                            | Exp #1              | Exp #2 | Exp #3 | Exp #4 | Exp #5 |
| 31.02 | $(\text{CH}_2\text{O})\text{H}^+$                                                                          | 4.6                 | 0.6    | 1.5    | 0.4    | -      |
| 33.03 | $(\text{CH}_3\text{OH})\text{H}^+$                                                                         | -                   | 10.3   | 30.8   | 20.8   | 3.8    |
| 42.01 | $(\text{C}_2\text{HO})\text{H}^+$                                                                          | 2.6                 | 0.3    | -      | 0.4    | 0.7    |
| 43.02 | $\text{C}_2\text{H}_3\text{O}^+$                                                                           | 72                  | 6.7    | 22.3   | 8.8    | 0.5    |
| 45.00 | $(\text{CO}_2)\text{H}^+$                                                                                  | 1.8                 | 0.9    | -      | 2.5    | 1.3    |
| 45.03 | $(\text{C}_2\text{H}_4\text{O})\text{H}^+$                                                                 | 34.4                | 2.5    | 8.2    | 4.2    | -      |
| 47.01 | $(\text{CH}_2\text{O}_2)\text{H}^+$                                                                        | 65.9                | 6.4    | 12.5   | 8.9    | 0.1    |
| 57.03 | $(\text{C}_3\text{H}_4\text{O})\text{H}^+$                                                                 | 13.1                | 0.6    | 2.4    | 0.8    | 0.2    |
| 58.03 | $(\text{C}_2\text{H}_3\text{NO})\text{H}^+$                                                                | 5.5                 | 0.5    | 0.8    | 0.6    | -      |
| 59.01 | $(\text{C}_2\text{H}_2\text{O}_2)\text{H}^+$                                                               | 5.6                 | -      | -      | 0.9    | 0.1    |
| 59.05 | $(\text{C}_3\text{H}_6\text{O})\text{H}^+$                                                                 | 30.7                | 8.1    | 8.4    | 11.8   | -      |
| 60.04 | $(\text{C}_2\text{H}_5\text{NO})\text{H}^+$                                                                | 8.3                 | 1      | 3.7    | 2      | 0.2    |
| 61.03 | $(\text{C}_2\text{H}_4\text{O}_2)\text{H}^+$                                                               | 57.5                | 5      | 22.1   | 9.8    | 0.7    |
| 65.02 | $\text{H}_2\text{O}(\text{CH}_2\text{O}_2)\text{H}^+$                                                      | 7.5                 | 0.6    | 1.8    | 1.4    | -      |
| 69.03 | $(\text{C}_4\text{H}_4\text{O})\text{H}^+$                                                                 | 2.9                 | 0.2    | 0.5    | 0.2    | -      |
| 71.01 | $(\text{C}_3\text{H}_2\text{O}_2)\text{H}^+$                                                               | 6.3                 | 0.3    | 1      | 0.5    | -      |
| 71.05 | $(\text{C}_4\text{H}_6\text{O})\text{H}^+$                                                                 | 5.2                 | 0.2    | 0.8    | 0.5    | 0.2    |
| 72.04 | $(\text{C}_3\text{H}_5\text{NO})\text{H}^+$                                                                | 2                   | 0.2    | 0.5    | 0.3    | -      |
| 73.03 | $(\text{C}_3\text{H}_4\text{O}_2)\text{H}^+$                                                               | 38.8                | 3.3    | 12.8   | 5      | 0.6    |
| 74.02 | $(\text{C}_2\text{H}_3\text{NO}_2)\text{H}^+$                                                              | 8.1                 | 0.6    | 1.9    | 1.4    | -      |
| 74.03 | $([13\text{C}]\text{C}_2\text{H}_4\text{O}_2)\text{H}^+$<br>+ $(\text{C}_3\text{H}_5\text{O}_2)\text{H}^+$ | 2.6                 | 0.2    | 0.9    | -      | -      |
| 75.01 | $(\text{C}_2\text{H}_2\text{O}_3)\text{H}^+$                                                               | 2.2                 | 0.2    | 0.6    | 0.3    | -      |
| 75.04 | $(\text{C}_3\text{H}_6\text{O}_2)\text{H}^+$                                                               | 15.7                | 1.3    | 5.2    | 1.7    | 0.3    |
| 76.04 | $(\text{C}_2\text{H}_5\text{NO}_2)\text{H}^+$                                                              | 2.2                 | 0.2    | 0.8    | 0.5    | -      |
| 77.02 | $(\text{C}_2\text{H}_4\text{O}_3)\text{H}^+$                                                               | 4.5                 | 0.3    | 1.8    | 0.5    | 0.1    |
| 79.04 | $((\text{C}_2\text{H}_4\text{O}_2)\text{H}_2\text{O})\text{H}^+$                                           | 1.7                 | -      | 0.2    | 0.1    | -      |
| 83.01 | $(\text{C}_4\text{H}_2\text{O}_2)\text{H}^+$                                                               | 1.7                 | 0.1    | 0.3    | 0.2    | -      |
| 83.05 | $(\text{C}_5\text{H}_6\text{O})\text{H}^+$                                                                 | 5.5                 | 0.2    | 0.9    | 0.4    | 0.1    |
| 84.04 | $(\text{C}_4\text{H}_5\text{NO})\text{H}^+$                                                                | 1.8                 | 0.1    | -      | 0.2    | -      |
| 85.03 | $(\text{C}_4\text{H}_4\text{O}_2)\text{H}^+$                                                               | 16.1                | 0.8    | 2.9    | 1.2    | 0.2    |
| 85.06 | $(\text{C}_5\text{H}_8\text{O})\text{H}^+$                                                                 | 3                   | 0.1    | 0.6    | 0.4    | 0.1    |
| 86.03 | $([13\text{C}]\text{C}_3\text{H}_4\text{O}_2)\text{H}^+$<br>+ $(\text{C}_4\text{H}_5\text{O}_2)\text{H}^+$ | 3.6                 | 0.2    | 0.9    | 0.5    | 0.1    |
| 87.01 | $(\text{C}_3\text{H}_2\text{O}_3)\text{H}^+$                                                               | 3.2                 | -      | -      | 0.3    | 0.1    |
| 87.04 | $(\text{C}_4\text{H}_6\text{O}_2)\text{H}^+$                                                               | 22.9                | 1.5    | 6.8    | 2.5    | 0.4    |
| 88.05 | $([13\text{C}]\text{C}_3\text{H}_6\text{O}_2)\text{H}^+$                                                   | -                   | 0.2    | 0.9    | 0.4    | -      |

|        |                                                                                                                                                   |      |     |     |     |     |
|--------|---------------------------------------------------------------------------------------------------------------------------------------------------|------|-----|-----|-----|-----|
| 89.02  | (C <sub>3</sub> H <sub>4</sub> O <sub>3</sub> )H <sup>+</sup>                                                                                     | 18.2 | 1   | 4.4 | 3.3 | 0.3 |
| 89.06  | (C <sub>4</sub> H <sub>8</sub> O <sub>2</sub> )H <sup>+</sup>                                                                                     | 2.3  | 0.3 | 1.3 | 0.8 | 0.3 |
| 90.02  | <b>(C<sub>2</sub>H<sub>3</sub>NO<sub>3</sub>)H<sup>+</sup></b>                                                                                    | 6.5  | 0.7 | 7.4 | 2.2 | 0.8 |
| 91.04  | (C <sub>3</sub> H <sub>6</sub> O <sub>3</sub> )H <sup>+</sup>                                                                                     | 4.2  | 0.3 | 1.1 | 0.3 | -   |
| 93.05  | (C <sub>5</sub> H <sub>4</sub> N <sub>2</sub> )H <sup>+</sup>                                                                                     | 2    | 0.2 | 0.7 | 0.4 | -   |
| 95.05  | (C <sub>6</sub> H <sub>6</sub> O)H <sub>+</sub>                                                                                                   | 3.4  | 0.1 | 0.2 | -   | 0.1 |
| 97.03  | (C <sub>5</sub> H <sub>4</sub> O <sub>2</sub> )H <sup>+</sup>                                                                                     | 10.8 | 0.6 | 1.7 | 0.9 | -   |
| 97.06  | (C <sub>6</sub> H <sub>8</sub> O)H <sup>+</sup>                                                                                                   | 7.5  | 0.3 | 1   | 0.4 | -   |
| 98.03  | ([ <sup>13</sup> C]C <sub>4</sub> H <sub>4</sub> O <sub>2</sub> )H <sup>+</sup><br>+(C <sub>5</sub> H <sub>5</sub> O <sub>2</sub> )H <sup>+</sup> | 4.7  | 0.3 | 0.8 | 0.6 | 0.1 |
| 99.01  | (C <sub>4</sub> H <sub>2</sub> O <sub>3</sub> )H <sup>+</sup>                                                                                     | 21.3 | 1.7 | 1.6 | 1.9 | 0.5 |
| 99.04  | (C <sub>3</sub> H <sub>6</sub> O <sub>2</sub> )H <sup>+</sup>                                                                                     | 20.3 | 1.1 | 4.2 | 1.6 | 0.3 |
| 100.04 | <b>(C<sub>4</sub>H<sub>5</sub>NO<sub>2</sub>)H<sup>+</sup></b>                                                                                    | 5.2  | 0.3 | 1   | 0.8 | 0.1 |
| 101.02 | (C <sub>4</sub> H <sub>4</sub> O <sub>3</sub> )H <sup>+</sup>                                                                                     | 18.5 | 1.3 | 3.9 | 2   | 0.3 |
| 101.06 | (C <sub>5</sub> H <sub>8</sub> O <sub>2</sub> )H <sup>+</sup>                                                                                     | 6.9  | 0.4 | 2.3 | 0.9 | 0.2 |
| 103.04 | (C <sub>4</sub> H <sub>6</sub> O <sub>3</sub> )H <sup>+</sup>                                                                                     | 14   | 0.7 | 4   | 1.3 | 0.2 |
| 104.04 | ([ <sup>13</sup> C]C <sub>3</sub> H <sub>6</sub> O <sub>3</sub> )H <sup>+</sup>                                                                   | 2.3  | 0.2 | 0.9 | 0.3 | -   |
| 105.02 | (C <sub>3</sub> H <sub>4</sub> O <sub>4</sub> )H <sup>+</sup>                                                                                     | 7.4  | 0.4 | 2.1 | 0.6 | 0.2 |
| 107.05 | (C <sub>7</sub> H <sub>6</sub> O)H <sup>+</sup>                                                                                                   | 6.4  | 0.1 | 0.4 | 0.1 | 0.1 |
| 109.03 | (C <sub>6</sub> H <sub>4</sub> O <sub>2</sub> )H <sup>+</sup>                                                                                     | 1.6  | 0.1 | 0.2 | 0.2 | -   |
| 109.07 | (C <sub>7</sub> H <sub>8</sub> O)H <sup>+</sup>                                                                                                   | 5.3  | 0.2 | 0.5 | -   | -   |
| 111.04 | (C <sub>6</sub> H <sub>6</sub> O <sub>2</sub> )H <sup>+</sup>                                                                                     | 18   | 0.7 | 2.6 | 1   | 0.1 |
| 111.08 | (C <sub>7</sub> H <sub>10</sub> O)H <sup>+</sup>                                                                                                  | 5.6  | 0.2 | 0.6 | 0.2 | -   |
| 112.04 | <b>(C<sub>5</sub>H<sub>5</sub>NO<sub>2</sub>)H<sup>+</sup></b>                                                                                    | 5.8  | 0.3 | 1   | 0.6 | -   |
| 113.02 | (C <sub>3</sub> H <sub>4</sub> O <sub>3</sub> )H <sup>+</sup>                                                                                     | 24.9 | 1.9 | 4.1 | 1.8 | 0.4 |
| 113.06 | (C <sub>6</sub> H <sub>8</sub> O <sub>2</sub> )H <sup>+</sup>                                                                                     | 13.6 | 0.7 | 3   | 1   | 0.1 |
| 114.03 | ([ <sup>13</sup> C]C <sub>4</sub> H <sub>4</sub> O <sub>3</sub> )H <sup>+</sup>                                                                   | 3.4  | 0.2 | 0.9 | 0.5 | 0.1 |
| 115.02 | (C <sub>8</sub> H <sub>2</sub> O)H <sup>+</sup>                                                                                                   | 4.3  | 0.1 | 0.7 | 0.6 | 0.3 |
| 115.04 | (C <sub>5</sub> H <sub>6</sub> O <sub>3</sub> )H <sup>+</sup>                                                                                     | 26.6 | 2.1 | 7.7 | 2.4 | 0.3 |
| 115.08 | (C <sub>6</sub> H <sub>10</sub> O <sub>2</sub> )H <sup>+</sup>                                                                                    | 2.2  | 0.2 | 0.8 | 0.3 | 0.1 |
| 116.04 | <b>(C<sub>4</sub>H<sub>5</sub>NO<sub>3</sub>)H<sup>+</sup></b>                                                                                    | 4.6  | 0.2 | 1.2 | 0.6 | 0.1 |
| 117.02 | (C <sub>4</sub> H <sub>4</sub> O <sub>4</sub> )H <sup>+</sup>                                                                                     | 13.5 | 0.6 | 1.3 | 0.7 | 0.1 |
| 117.06 | (C <sub>5</sub> H <sub>8</sub> O <sub>3</sub> )H <sup>+</sup>                                                                                     | 6.7  | 0.5 | 2.6 | 0.9 | 0.2 |
| 119.03 | (C <sub>4</sub> H <sub>6</sub> O <sub>4</sub> )H <sup>+</sup>                                                                                     | 3.7  | 0.2 | 0.6 | -   | -   |
| 123.04 | (C <sub>7</sub> H <sub>6</sub> O <sub>2</sub> )H <sup>+</sup>                                                                                     | 4.6  | 0.2 | 0.7 | 0.5 | 0.5 |
| 124.05 | ([ <sup>13</sup> C]C <sub>6</sub> H <sub>6</sub> O <sub>2</sub> )H <sup>+</sup><br>+(C <sub>7</sub> H <sub>7</sub> O <sub>2</sub> )H <sup>+</sup> | 3.5  | 0.1 | 0.5 | 0.3 | 0.1 |
| 125.02 | (C <sub>6</sub> H <sub>4</sub> O <sub>3</sub> )H <sup>+</sup>                                                                                     | 4.1  | 0.2 | 0.8 | 0.4 | 0.1 |
| 125.06 | (C <sub>7</sub> H <sub>8</sub> O <sub>2</sub> )H <sup>+</sup>                                                                                     | 11.5 | 0.5 | 2.2 | 0.6 | 0.1 |
| 126.02 | (C <sub>2</sub> H <sub>5</sub> O <sub>6</sub> )H <sup>+</sup>                                                                                     | 1.9  | 0.4 | 0.6 | 0.3 | -   |
| 126.06 | (C <sub>6</sub> H <sub>7</sub> NO <sub>2</sub> )H <sup>+</sup>                                                                                    | 3.5  | 0.2 | 0.7 | 0.3 | -   |
| 127.04 | (C <sub>6</sub> H <sub>6</sub> O <sub>3</sub> )H <sup>+</sup>                                                                                     | 18.5 | 0.9 | 4.6 | 1.4 | 0.2 |
| 127.08 | (C <sub>7</sub> H <sub>10</sub> O <sub>2</sub> )H <sup>+</sup>                                                                                    | 4.7  | 0.2 | 0.9 | 0.3 | 0.1 |
| 128.04 | ([ <sup>13</sup> C]C <sub>5</sub> H <sub>6</sub> O <sub>3</sub> )H <sup>+</sup>                                                                   | 2.3  | 0.2 | 1.2 | 0.5 | 0.1 |
| 129.02 | (C <sub>5</sub> H <sub>4</sub> O <sub>4</sub> )H <sup>+</sup>                                                                                     | 4.2  | 0.2 | 1.1 | 0.5 | 0.1 |
| 129.06 | (C <sub>6</sub> H <sub>8</sub> O <sub>3</sub> )H <sup>+</sup>                                                                                     | 15   | 0.9 | 4.3 | 1.2 | 0.2 |
| 130.04 | (C <sub>9</sub> H <sub>5</sub> O)H <sup>+</sup>                                                                                                   | 3.8  | 0.2 | 0.7 | 0.4 | -   |

|                                                         |                                                                                                               |             |             |             |             |             |
|---------------------------------------------------------|---------------------------------------------------------------------------------------------------------------|-------------|-------------|-------------|-------------|-------------|
| 130.06                                                  | $([^{13}\text{C}]\text{C}_5\text{H}_8\text{O}_3)\text{H}^+$                                                   | 2.9         | 0.2         | 0.8         | 0.3         | -           |
| 131.03                                                  | $(\text{C}_5\text{H}_6\text{O}_4)\text{H}^+$                                                                  | 8.4         | 0.4         | 2           | 0.7         | 0.1         |
| 131.07                                                  | $(\text{C}_6\text{H}_{10}\text{O}_3)\text{H}^+$                                                               | -           | -           | 0.7         | 0.2         | 0.1         |
| 132.04                                                  | $([^{13}\text{C}]\text{C}_4\text{H}_6\text{O}_4)\text{H}^+$<br>+ $(\text{C}_5\text{H}_7\text{O}_4)\text{H}^+$ | 1.8         | -           | 0.6         | 0.3         | -           |
| 133.05                                                  | $(\text{C}_5\text{H}_8\text{O}_4)\text{H}^+$                                                                  | 4           | 0.2         | 1           | 0.4         | -           |
| 137.06                                                  | $(\text{C}_8\text{H}_8\text{O}_2)\text{H}^+$                                                                  | 5.7         | 0.3         | 0.8         | -           | 0.1         |
| 138.05                                                  | $(\text{C}_7\text{H}_7\text{NO}_2)\text{H}^+$                                                                 | 3.2         | 0.1         | 0.3         | 0.1         | 0.1         |
| 139.04                                                  | $(\text{C}_7\text{H}_6\text{O}_3)\text{H}^+$                                                                  | 6.8         | 0.4         | 1.6         | 0.6         | 0.1         |
| 139.08                                                  | $(\text{C}_8\text{H}_{10}\text{O}_2)\text{H}^+$                                                               | 8.4         | 0.3         | 1           | 0.3         | -           |
| 140.03                                                  | $(\text{C}_6\text{H}_5\text{NO}_3)\text{H}^+$                                                                 | 4.1         | 0.2         | 0.7         | 0.4         | 0.1         |
| 141.02                                                  | $(\text{C}_6\text{H}_4\text{O}_4)\text{H}^+$                                                                  | 2.8         | -           | 0.5         | 0.3         | 0.1         |
| 141.06                                                  | $(\text{C}_7\text{H}_8\text{O}_3)\text{H}^+$                                                                  | 16.1        | 0.7         | 3.9         | 1.1         | 0.2         |
| 142.06                                                  | $([^{13}\text{C}]\text{C}_6\text{H}_8\text{O}_3)\text{H}^+$<br>+ $(\text{C}_7\text{H}_9\text{O}_3)\text{H}^+$ | 6.2         | 0.2         | 1.2         | 0.5         | -           |
| 143.03                                                  | $(\text{C}_6\text{H}_6\text{O}_4)\text{H}^+$                                                                  | 8.1         | 0.4         | 2.1         | 0.8         | 0.1         |
| 143.07                                                  | $(\text{C}_7\text{H}_{10}\text{O}_3)\text{H}^+$                                                               | 3.8         | 0.2         | 1.1         | 0.3         | 0.1         |
| 144.04                                                  | $([^{13}\text{C}]\text{C}_5\text{H}_6\text{O}_4)\text{H}^+$<br>+ $(\text{C}_6\text{H}_7\text{O}_4)\text{H}^+$ | 2.9         | 0.2         | 0.7         | 0.3         | -           |
| 145.05                                                  | $(\text{C}_6\text{H}_8\text{O}_4)\text{H}^+$                                                                  | 6.5         | 0.3         | 1.7         | 0.5         | 0.1         |
| 149.02                                                  | $(\text{C}_8\text{H}_4\text{O}_3)\text{H}^+$                                                                  | 6.5         | 0.5         | 0.7         | 1           | 0.2         |
| 151.04                                                  | $(\text{C}_8\text{H}_6\text{O}_3)\text{H}^+$                                                                  | 2.7         | 0.1         | -           | -           | 0.1         |
| 153.06                                                  | $(\text{C}_8\text{H}_8\text{O}_3)\text{H}^+$                                                                  | 10.4        | 0.4         | 2           | 0.5         | 0.1         |
| 152.07                                                  | $(\text{C}_8\text{H}_9\text{NO}_2)\text{H}^+$                                                                 | 2.1         | 0.1         | 0.1         | -           | -           |
| 154.05                                                  | $(\text{C}_7\text{H}_7\text{NO}_3)\text{H}^+$                                                                 | 4.9         | 0.2         | 0.8         | 0.3         | 0.1         |
| 155.03                                                  | $(\text{C}_7\text{H}_6\text{O}_4)\text{H}^+$                                                                  | 4.6         | 0.2         | 0.9         | 0.3         | 0.1         |
| 155.07                                                  | $(\text{C}_8\text{H}_{10}\text{O}_3)\text{H}^+$                                                               | 10.2        | 0.3         | 1.8         | 0.5         | 0.1         |
| 156.03                                                  | $(\text{C}_6\text{H}_5\text{NO}_4)\text{H}^+$                                                                 | 4.2         | 0.1         | 0.5         | 0.3         | -           |
| 157.05                                                  | $(\text{C}_7\text{H}_8\text{O}_4)\text{H}^+$                                                                  | 9.6         | 0.3         | 2.5         | 0.6         | 0.1         |
| 159.03                                                  | $(\text{C}_6\text{H}_6\text{O}_5)\text{H}^+$                                                                  | 4.3         | -           | 0.8         | 0.3         | 0.1         |
| 161.04                                                  | $(\text{C}_6\text{H}_8\text{O}_5)\text{H}^+$                                                                  | 2.9         | -           | 0.7         | 0.2         | 0.1         |
| 163.04                                                  | $(\text{C}_9\text{H}_6\text{O}_3)\text{H}^+$                                                                  | 3.6         | 0.2         | 0.5         | 0.4         | 0.2         |
| 167.07                                                  | $(\text{C}_9\text{H}_{10}\text{O}_3)\text{H}^+$                                                               | 4.6         | 0.2         | 0.9         | 0.2         | -           |
| 166.05                                                  | $(\text{C}_8\text{H}_7\text{NO}_3)\text{H}^+$                                                                 | 2.6         | 0.1         | 0.3         | 0.1         | -           |
| 168.07                                                  | $(\text{C}_8\text{H}_9\text{NO}_3)\text{H}^+$                                                                 | 3.7         | 0.1         | 0.4         | -           | 0.1         |
| 169.05                                                  | $(\text{C}_8\text{H}_8\text{O}_4)\text{H}^+$                                                                  | 3.6         | 0.2         | 1           | 0.3         | -           |
| 170.05                                                  | $(\text{C}_7\text{H}_7\text{NO}_4)\text{H}^+$                                                                 | 6.8         | 0.2         | 0.6         | -           | -           |
| 171.03                                                  | $(\text{C}_7\text{H}_6\text{O}_5)\text{H}^+$                                                                  | 2.7         | 0.1         | 0.2         | 0.1         | -           |
| 171.07                                                  | $(\text{C}_8\text{H}_{10}\text{O}_4)\text{H}^+$                                                               | 11.4        | 0.3         | 2.2         | 0.5         | 0.1         |
| 173.04                                                  | $(\text{C}_7\text{H}_8\text{O}_5)\text{H}^+$                                                                  | 7.9         | 0.2         | 1.1         | 0.3         | -           |
| 185.08                                                  | $(\text{C}_9\text{H}_{12}\text{O}_4)\text{H}^+$                                                               | 4.2         | 0.1         | 0.8         | -           | -           |
| 187.06                                                  | $(\text{C}_8\text{H}_{10}\text{O}_5)\text{H}^+$                                                               | 7.1         | 0.1         | 1.2         | 0.3         | -           |
| <b>Fraction of the above compounds to the total SOA</b> |                                                                                                               | <b>0.83</b> | <b>0.92</b> | <b>0.89</b> | <b>0.89</b> | <b>0.79</b> |

88

89

90

91 **Table S6:**  $m/z$ 's detected in both gas and particle phase, which were used for the gas-  
 92 to-particle phase partitioning and the corresponding  $\log C^*$  calculation for each ion for  
 93 all experiments.

| Number of $m/z$ | $m/z$  | Molecular formula                                              | $\log C^*$ |        |        |        |        |
|-----------------|--------|----------------------------------------------------------------|------------|--------|--------|--------|--------|
|                 |        |                                                                | Exp #1     | Exp #2 | Exp #3 | Exp #4 | Exp #5 |
| 1               | 57.03  | (C <sub>3</sub> H <sub>4</sub> O)H <sup>+</sup>                | 4.39       | 4.64   | 4.43   | 3.82   | 3.90   |
| 2               | 59.01  | (C <sub>2</sub> H <sub>2</sub> O <sub>2</sub> )H <sup>+</sup>  | 4.00       | -      | -      | -      | 3.00   |
| 3               | 59.05  | (C <sub>3</sub> H <sub>6</sub> O)H <sup>+</sup>                | 5.00       | 4.53   | 4.87   | 3.83   | -      |
| 4               | 61.03  | (C <sub>2</sub> H <sub>4</sub> O <sub>2</sub> )H <sup>+</sup>  | 4.46       | 4.10   | 4.52   | 3.97   | 4.30   |
| 5               | 71.05  | (C <sub>4</sub> H <sub>6</sub> O)H <sup>+</sup>                | 4.60       | 4.83   | 4.39   | 3.85   | 3.75   |
| 6               | 73.03  | (C <sub>3</sub> H <sub>4</sub> O <sub>2</sub> )H <sup>+</sup>  | 4.60       | 4.55   | 4.37   | 3.57   | 3.59   |
| 7               | 75.01  | (C <sub>2</sub> H <sub>2</sub> O <sub>3</sub> )H <sup>+</sup>  | 3.87       | 2.87   | 3.65   | 3.19   | 3.05   |
| 8               | 75.04  | (C <sub>3</sub> H <sub>6</sub> O <sub>2</sub> )H <sup>+</sup>  | 4.28       | 4.06   | 4.31   | 3.70   | 3.81   |
| 9               | 77.02  | (C <sub>2</sub> H <sub>3</sub> O <sub>3</sub> )H <sup>+</sup>  | 4.56       | 4.12   | 5.00   | 4.00   | 3.89   |
| 10              | 83.05  | (C <sub>5</sub> H <sub>6</sub> O)H <sup>+</sup>                | 3.90       | 4.05   | 3.55   | 2.99   | 2.54   |
| 11              | 85.03  | (C <sub>4</sub> H <sub>4</sub> O <sub>2</sub> )H <sup>+</sup>  | 3.94       | 3.78   | 3.59   | 3.18   | 3.24   |
| 12              | 85.06  | (C <sub>5</sub> H <sub>8</sub> O)H <sup>+</sup>                | 4.56       | 4.73   | 4.40   | 3.83   | 3.54   |
| 13              | 87.01  | (C <sub>3</sub> H <sub>2</sub> O <sub>3</sub> )H <sup>+</sup>  | 4.10       | 3.55   | 2.69   | 2.86   | 2.49   |
| 14              | 87.04  | (C <sub>4</sub> H <sub>6</sub> O <sub>2</sub> )H <sup>+</sup>  | 4.35       | 4.38   | 4.22   | 3.66   | 3.57   |
| 15              | 89.06  | (C <sub>4</sub> H <sub>8</sub> O <sub>2</sub> )H <sup>+</sup>  | 4.49       | 4.05   | 4.31   | 3.77   | 3.56   |
| 16              | 91.04  | (C <sub>3</sub> H <sub>6</sub> O <sub>3</sub> )H <sup>+</sup>  | 3.54       | -      | 4.16   | 3.23   | 3.74   |
| 17              | 95.05  | (C <sub>6</sub> H <sub>6</sub> O)H <sup>+</sup>                | 4.04       | 4.54   | -      | -      | 2.77   |
| 18              | 97.03  | C <sub>5</sub> H <sub>4</sub> O <sub>2</sub> H <sup>+</sup>    | 4.11       | 3.73   | 3.97   | 3.18   | 3.97   |
| 19              | 97.06  | (C <sub>6</sub> H <sub>8</sub> O)H <sup>+</sup>                | 3.83       | 3.92   | 3.61   | 2.95   | 3.41   |
| 20              | 99.01  | (C <sub>4</sub> H <sub>2</sub> O <sub>3</sub> )H <sup>+</sup>  | 4.00       | 3.67   | 4.54   | 3.27   | 3.41   |
| 21              | 101.02 | (C <sub>4</sub> H <sub>4</sub> O <sub>3</sub> )H <sup>+</sup>  | 3.80       | 3.36   | 3.79   | 3.25   | 3.45   |
| 22              | 101.06 | (C <sub>5</sub> H <sub>8</sub> O <sub>2</sub> )H <sup>+</sup>  | 4.31       | 4.30   | 4.08   | 3.59   | 3.39   |
| 23              | 103.04 | (C <sub>4</sub> H <sub>6</sub> O <sub>3</sub> )H <sup>+</sup>  | 3.85       | 3.33   | 3.43   | 2.94   | 3.04   |
| 24              | 103.08 | (C <sub>3</sub> H <sub>10</sub> O <sub>2</sub> )H <sup>+</sup> | -          | -      | -      | 3.64   | 3.30   |
| 25              | 105.02 | (C <sub>3</sub> H <sub>4</sub> O <sub>4</sub> )H <sup>+</sup>  | 3.60       | 3.42   | 3.05   | 2.59   | 2.67   |
| 26              | 107.05 | (C <sub>7</sub> H <sub>6</sub> O)H <sup>+</sup>                | 4.28       | 4.50   | 4.61   | -      | 2.97   |
| 27              | 109.07 | (C <sub>7</sub> H <sub>8</sub> O)H <sup>+</sup>                | 3.98       | 4.55   | 3.65   | 3.33   | 3.49   |
| 28              | 111.04 | (C <sub>6</sub> H <sub>6</sub> O <sub>2</sub> )H <sup>+</sup>  | 4.02       | 3.80   | 3.79   | 3.02   | 2.99   |
| 29              | 113.02 | (C <sub>5</sub> H <sub>4</sub> O <sub>3</sub> )H <sup>+</sup>  | 4.22       | 3.87   | 4.24   | 3.39   | 3.46   |
| 30              | 113.06 | (C <sub>6</sub> H <sub>8</sub> O <sub>2</sub> )H <sup>+</sup>  | 4.54       | 4.69   | 4.01   | 3.48   | 3.48   |
| 31              | 115.04 | (C <sub>5</sub> H <sub>6</sub> O <sub>3</sub> )H <sup>+</sup>  | 3.85       | 3.40   | 3.59   | 3.06   | 3.31   |
| 32              | 115.08 | (C <sub>6</sub> H <sub>10</sub> O <sub>2</sub> )H <sup>+</sup> | 4.48       | 4.46   | 4.34   | 3.86   | 3.46   |
| 33              | 117.02 | (C <sub>4</sub> H <sub>4</sub> O <sub>4</sub> )H <sup>+</sup>  | 3.44       | 3.05   | 3.47   | 2.90   | 3.00   |
| 34              | 117.06 | (C <sub>5</sub> H <sub>8</sub> O <sub>3</sub> )H <sup>+</sup>  | 3.62       | 2.91   | 3.59   | 2.94   | 2.67   |
| 35              | 119.03 | (C <sub>4</sub> H <sub>6</sub> O <sub>4</sub> )H <sup>+</sup>  | 3.72       | 3.00   | 3.54   | 3.13   | 3.36   |
| 36              | 121.07 | (C <sub>8</sub> H <sub>8</sub> O)H <sup>+</sup>                | 4.27       | 5.00   | 4.90   | -      | -      |
| 37              | 123.04 | (C <sub>7</sub> H <sub>6</sub> O <sub>2</sub> )H <sup>+</sup>  | 4.04       | 3.95   | 4.24   | 3.25   | 2.93   |
| 38              | 123.08 | (C <sub>8</sub> H <sub>10</sub> O)H <sup>+</sup>               | 4.35       | 5.05   | -      | -      | 2.99   |
| 39              | 125.02 | (C <sub>6</sub> H <sub>4</sub> O <sub>3</sub> )H <sup>+</sup>  | 3.95       | 3.70   | 4.04   | 3.35   | 3.64   |
| 40              | 125.06 | (C <sub>7</sub> H <sub>8</sub> O <sub>2</sub> )H <sup>+</sup>  | 3.88       | 3.62   | 3.58   | 3.02   | 3.06   |

|    |        |                                                                |      |      |      |      |      |
|----|--------|----------------------------------------------------------------|------|------|------|------|------|
| 41 | 127.04 | (C <sub>6</sub> H <sub>6</sub> O <sub>3</sub> )H <sup>+</sup>  | 3.96 | 3.74 | 3.75 | 3.11 | 3.31 |
| 42 | 127.08 | (C <sub>7</sub> H <sub>10</sub> O <sub>2</sub> )H <sup>+</sup> | 4.29 | 4.46 | 3.85 | 3.36 | 3.29 |
| 43 | 129.02 | (C <sub>5</sub> H <sub>4</sub> O <sub>4</sub> )H <sup>+</sup>  | 4.04 | 3.44 | 3.56 | 3.11 | 2.99 |
| 44 | 129.06 | (C <sub>6</sub> H <sub>8</sub> O <sub>3</sub> )H <sup>+</sup>  | 3.92 | 3.58 | 3.66 | 2.55 | 2.93 |
| 45 | 131.03 | (C <sub>5</sub> H <sub>6</sub> O <sub>4</sub> )H <sup>+</sup>  | 3.60 | 3.35 | 3.29 | 2.89 | 2.79 |
| 46 | 133.05 | (C <sub>5</sub> H <sub>8</sub> O <sub>4</sub> )H <sup>+</sup>  | 3.67 | 3.55 | 3.19 | 2.67 | 2.43 |
| 47 | 135.05 | (C <sub>8</sub> H <sub>6</sub> O <sub>2</sub> )H <sup>+</sup>  | 3.89 | 3.22 | 2.75 | -    | 1.73 |
| 48 | 135.08 | (C <sub>9</sub> H <sub>10</sub> O)H <sup>+</sup>               | 4.03 | 4.27 | -    | -    | 3.17 |
| 49 | 137.06 | (C <sub>8</sub> H <sub>8</sub> O <sub>2</sub> )H <sup>+</sup>  | 4.12 | 3.97 | 4.15 | 3.70 | 3.51 |
| 50 | 138.06 | <b>(C<sub>7</sub>H<sub>7</sub>NO<sub>2</sub>)H<sup>+</sup></b> | 4.66 | -    | -    | -    | -    |
| 51 | 139.04 | (C <sub>7</sub> H <sub>6</sub> O <sub>3</sub> )H <sup>+</sup>  | 4.06 | 3.85 | 3.76 | 3.29 | 3.15 |
| 52 | 139.08 | (C <sub>8</sub> H <sub>10</sub> O <sub>2</sub> )H <sup>+</sup> | 3.90 | 3.93 | 3.56 | 3.02 | 3.13 |
| 53 | 140.03 | <b>(C<sub>6</sub>H<sub>5</sub>NO<sub>3</sub>)H<sup>+</sup></b> | 4.18 | 3.93 | 3.92 | 3.46 | 3.23 |
| 54 | 141.06 | (C <sub>7</sub> H <sub>8</sub> O <sub>3</sub> )H <sup>+</sup>  | 3.81 | 3.57 | 3.55 | 3.01 | 3.11 |
| 55 | 143.03 | (C <sub>6</sub> H <sub>6</sub> O <sub>4</sub> )H <sup>+</sup>  | 3.81 | 3.41 | 3.35 | 2.93 | 2.77 |
| 56 | 145.05 | (C <sub>6</sub> H <sub>8</sub> O <sub>4</sub> )H <sup>+</sup>  | 3.74 | 3.39 | 3.26 | 2.74 | 2.75 |
| 57 | 147.03 | (C <sub>5</sub> H <sub>6</sub> O <sub>5</sub> )H <sup>+</sup>  | 3.90 | -    | 3.29 | -    | 2.37 |
| 58 | 149.04 | (C <sub>5</sub> H <sub>8</sub> O <sub>5</sub> )H <sup>+</sup>  | -    | -    | 3.75 | -    | 3.79 |
| 59 | 151.08 | (C <sub>9</sub> H <sub>10</sub> O <sub>2</sub> )H <sup>+</sup> | 3.97 | 3.88 | 3.93 | -    | 3.17 |
| 60 | 152.07 | <b>(C<sub>8</sub>H<sub>9</sub>NO<sub>2</sub>)H<sup>+</sup></b> | 4.49 | -    | -    | -    | -    |
| 61 | 153.06 | (C <sub>8</sub> H <sub>8</sub> O <sub>3</sub> )H <sup>+</sup>  | 3.85 | 3.65 | 3.38 | 2.43 | 2.40 |
| 62 | 154.05 | <b>(C<sub>7</sub>H<sub>7</sub>NO<sub>3</sub>)H<sup>+</sup></b> | 4.15 | 3.96 | 4.09 | 3.63 | 3.30 |
| 63 | 155.03 | (C <sub>7</sub> H <sub>6</sub> O <sub>4</sub> )H <sup>+</sup>  | 4.03 | 3.65 | 3.54 | 3.01 | 2.84 |
| 64 | 155.07 | (C <sub>8</sub> H <sub>10</sub> O <sub>3</sub> )H <sup>+</sup> | 3.87 | 3.82 | 3.56 | 3.17 | 2.89 |
| 65 | 157.05 | (C <sub>7</sub> H <sub>8</sub> O <sub>4</sub> )H <sup>+</sup>  | 3.73 | 3.35 | 3.29 | 2.86 | 2.90 |
| 66 | 168.07 | <b>(C<sub>8</sub>H<sub>9</sub>NO<sub>3</sub>)H<sup>+</sup></b> | 4.45 | 4.42 | 4.56 | -    | 3.45 |
| 67 | 170.05 | <b>(C<sub>7</sub>H<sub>7</sub>NO<sub>4</sub>)H<sup>+</sup></b> | 3.61 | 3.20 | 3.32 | 2.85 | -    |
| 68 | 173.04 | (C <sub>7</sub> H <sub>8</sub> O <sub>5</sub> )H <sup>+</sup>  | 3.90 | 3.51 | 3.32 | 2.83 | 2.61 |
| 69 | 181.05 | (C <sub>9</sub> H <sub>8</sub> O <sub>4</sub> )H <sup>+</sup>  | 3.97 | 3.56 | 3.28 | -    | 2.49 |

94

95

96

97

98

99

100

101

102

103

104

105

106

107

108

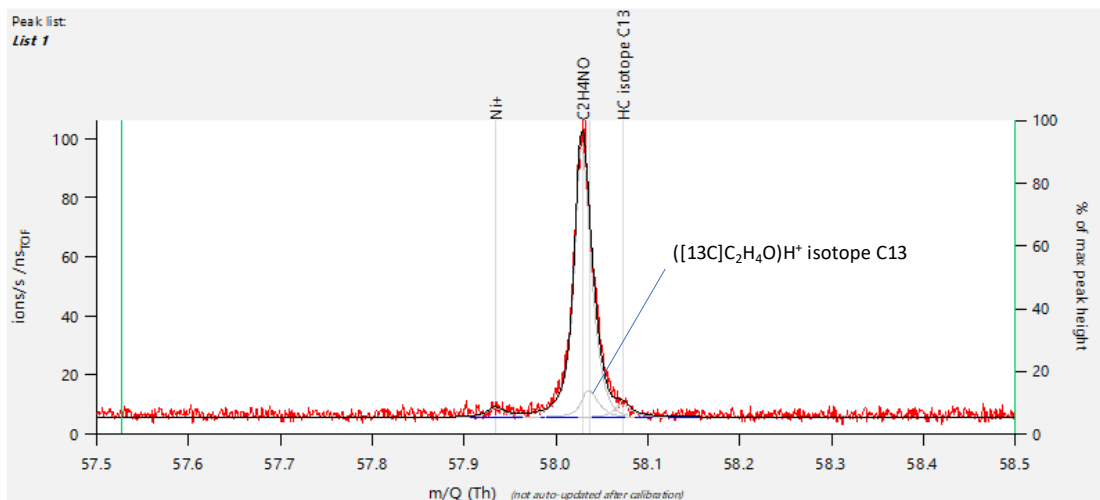

109

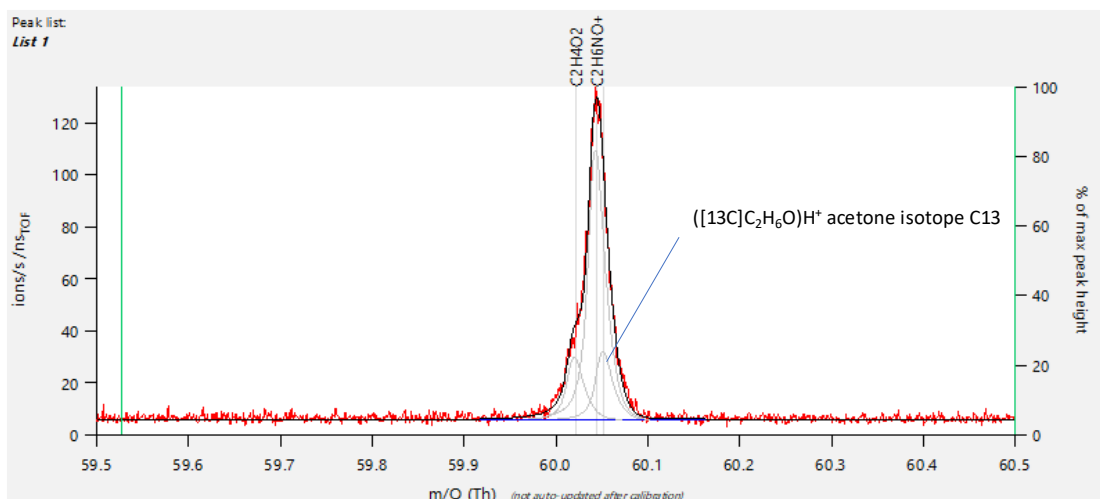

110

111 **Figure S1:** Examples of CHARON mass spectra containing ON at  $m/z$  58 (top) and  $m/z$   
112 60 (bottom). The contribution of the isotopes was present but clearly distinguished from  
113 the ON.

114

115

116

117

118

119

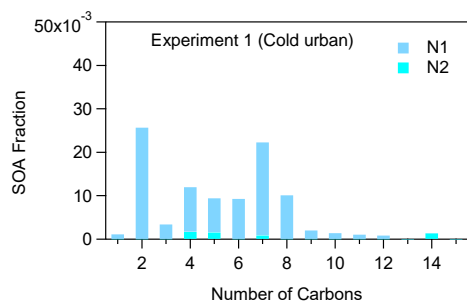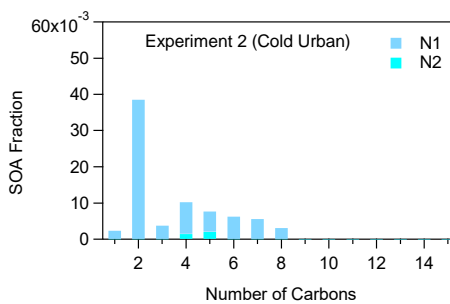

120

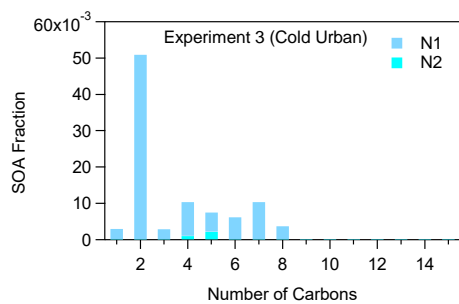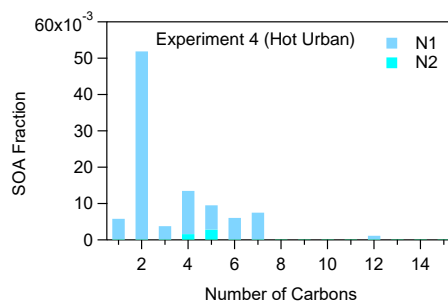

121

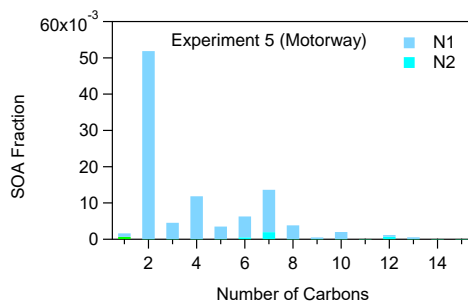

122

123 **Figure S2:** N to C distributions for the SOA formed during each one of the five  
 124 experiments.

125

126

127

128

129

130

131

132

133

134

135

136

137

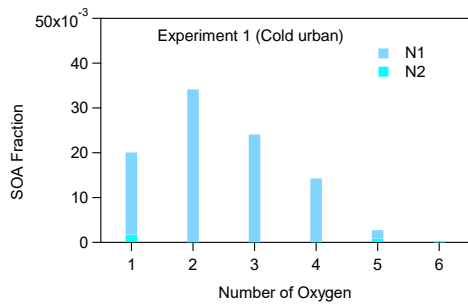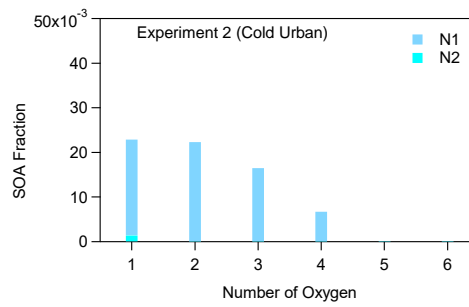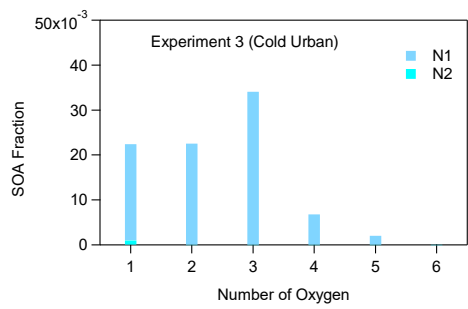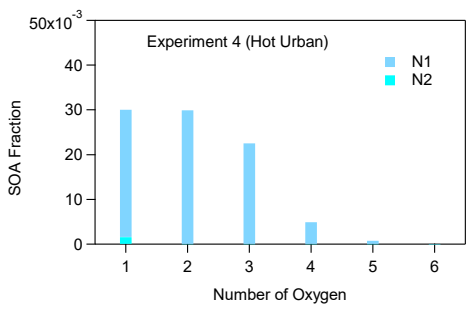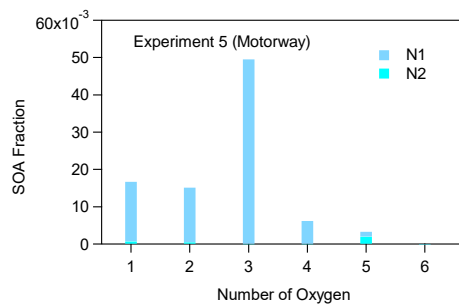

138

139

140

141 **Figure S3:** N to O distributions for the SOA formed during each one of the five  
 142 experiments.

143

144

145

146

147

148

149

150

151

152

153

154

155



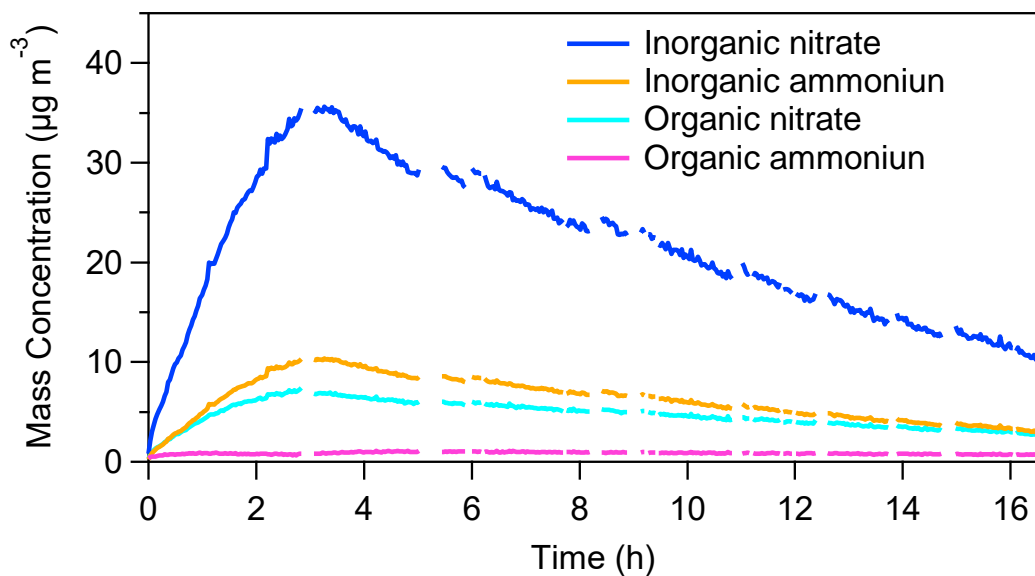

156

157

158 **Figure S4:** Time-series of inorganic nitrate, inorganic ammonium, organic nitrate and  
 159 organic ammonium mass concentrations for the experiment #5 (photo-oxidation of  
 160 motorway emissions). Time zero corresponds to the moment where the photo-oxidation  
 161 begins.

162

163

164

165

166

167

168

169

170

171

172

173

174

175

176

177

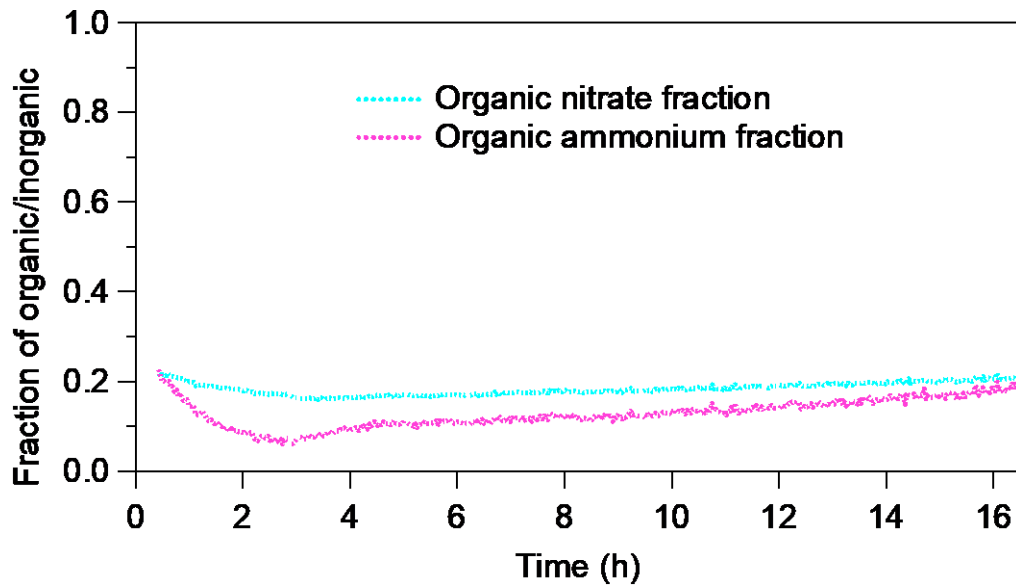

178

179

180 **Figure S5:** Mass fraction of organic nitrate and organic ammonium over the total nitrate  
181 and ammonium mass concentrations respectively for the experiment #5 (photo-  
182 oxidation of motorway emissions).

183

184

185

186

187

188

189

190

191

192

193

194

195

196

197

198

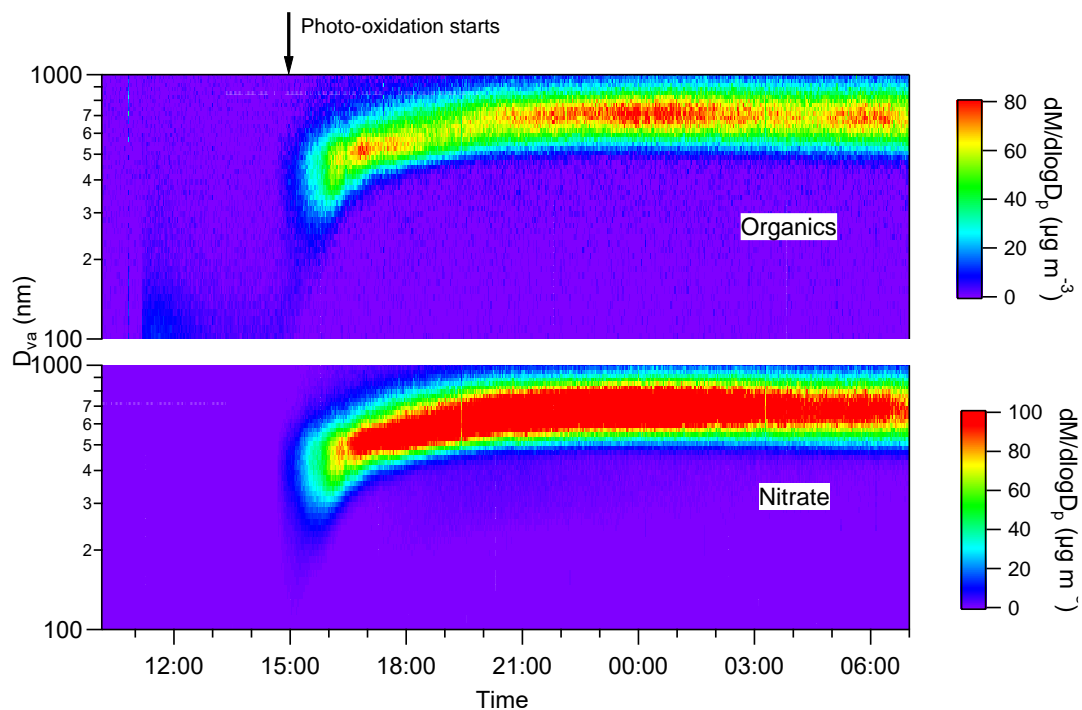

199

200

201 **Figure S6:** Organic and nitrate AMS mass distributions evolution for the experiment  
 202 #2 (photo-oxidation of cold urban emissions).

203

204

205

206

207

208

209

210

211

212

213

214

215

216

217

218 **References**

- 219 Bosque, R.; and Sales, J.: Polarizabilities of solvents from the chemical composition, J.  
220 Chem. Inf. Comput. Sci., 42 (5), 1154–1163, 2002.
- 221 Ellis, A. M.; Mayhew, C. A.: Proton Transfer Reaction Mass Spectrometry; John Wiley  
222 & Sons, Ltd: Hoboken, NJ, pp. 25–48, 2014.
- 223 Gioumousis, G.; Stevenson, D. P.: Reactions of gaseous molecule ions with gaseous  
224 molecules. v. theory, J. Chem. Phys., 29, 294–299, 1958.
- 225 Langevin, P. J. : Recombination et mobilités des ions dans les gaz, Ann. Chim. Phys.,  
226 28, 433–530, 1903.
- 227 Su, T.; Chesnavich, W. J.: Parametrization of the ion–polar molecule collision rate  
228 constant by trajectory calculations, J. Chem. Phys., 76, 5183–5185, 1982.
